# Supplementary material for: Towards an Integrated Observational System to Investigate Sediment Transport in the Tidal Inlets of the Lagoon of Venice
Source: MDPI journal article supplement (doi:10.3390/rs14143371), 2022-07-13
Supplement: s1 [file s1]

Supplementary Materials:

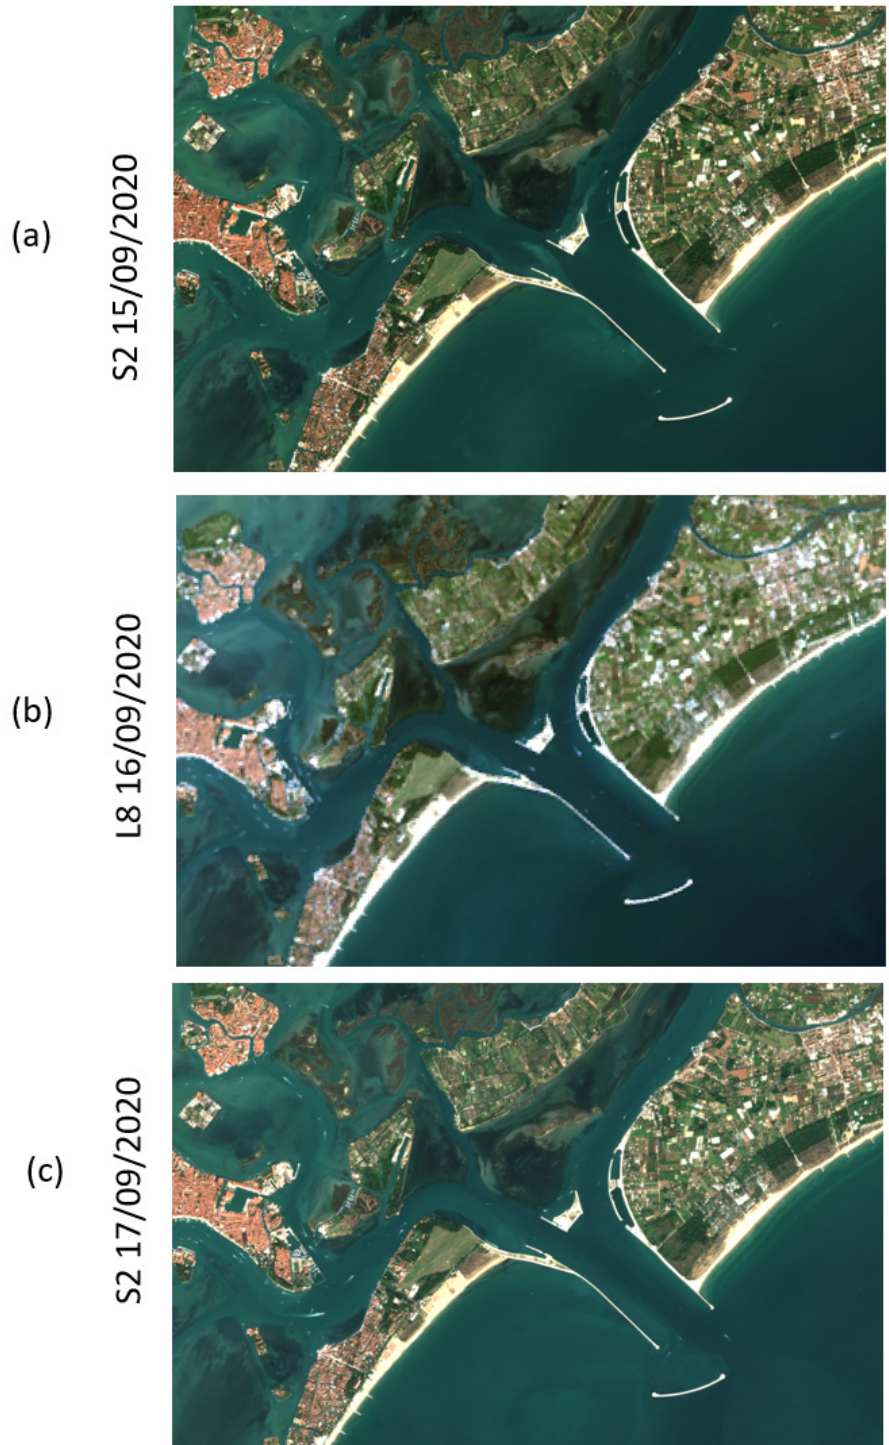

Figure S1. Satellite true-colour images of the study area for the investigated period: (panel a) Sentinel-2 September 15th; (panel b) Landsat 8 September 16th; (panel c) Sentinel-2 September 17th.

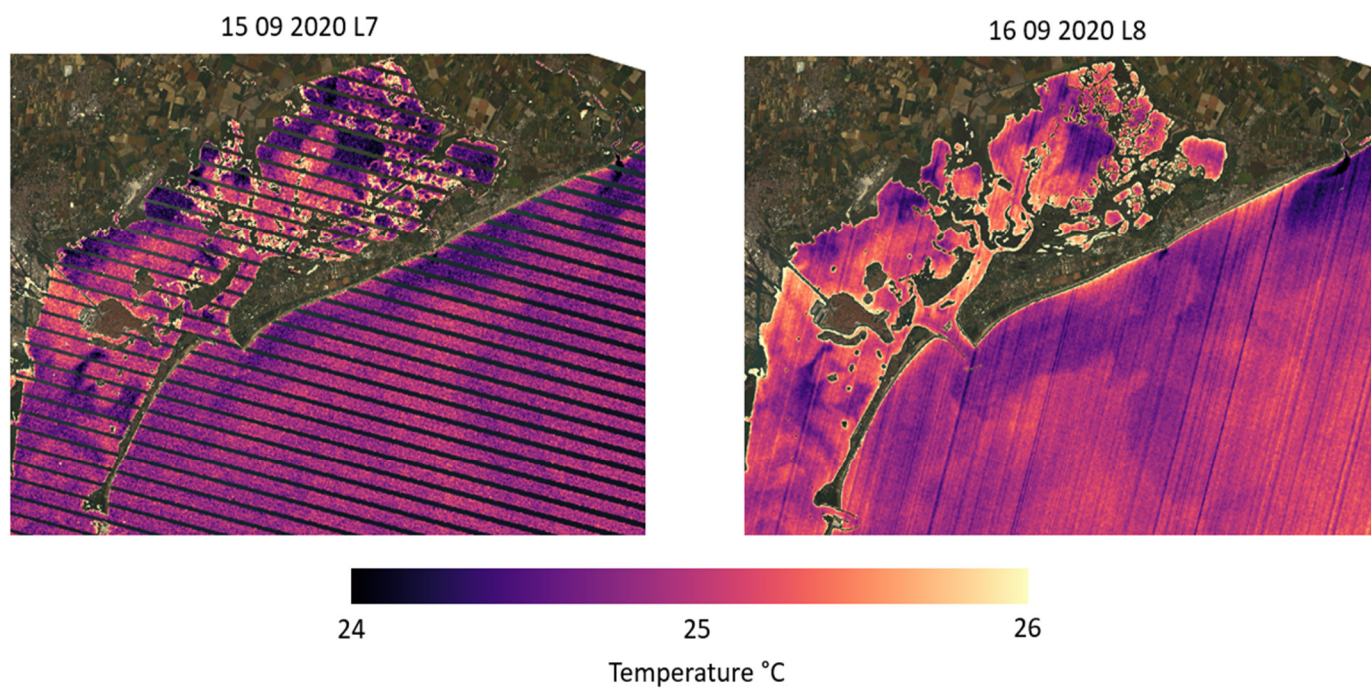

Figure S2. Sea Surface Temperature (SST) maps derived from Landsat 7 and Landsat 8 sensors, acquired on 15th and 16th September, respectively. Both scenes show a belt of relatively colder water ( $\Delta T = 0.8\text{ }^{\circ}\text{C}$ ) originating from the jets of river mouths located on the northern sector of the Adriatic Sea and moving southward following the local coastal current.
